# Supplementary material
Source: HighWire-hosted journal article supplement (https://jnm.snmjournals.org/highwire/filestream/94744/field_highwire_adjunct_files/0/149054_Supplemental_Data.pdf)
Supplement: 149054_Supplemental_Data.pdf [file 149054_Supplemental_Data.pdf]

**SUPPLEMENTAL TABLE 1.** Biodistribution of <sup>90</sup>Y-DOTA-AR in nude mice bearing PC-3 tumors. Values are means ± SD %IA/g (n=15).

| <b>Organ</b>              | <b>1h</b>   | <b>4h</b>     | <b>24h</b>  | <b>48h</b>  |
|---------------------------|-------------|---------------|-------------|-------------|
| <b>Tumor</b>              | 3.62±0.95   | 2.92±0.57     | 0.45±0.04   | 0.10±0.05   |
| <b>Muscle</b>             | 0.17±0.02   | 0.01±0.01     | 0.01±0.00   | 0.01±0.00   |
| <b>Small Intestine</b>    | 0.19±0.08   | 0.19±0.03     | 0.01±0.01   | 0.01±0.00   |
| <b>Large Intestine</b>    | 0.27±0.03   | 0.07±0.02     | 0.02±0.03   | 0.01±0.00   |
| <b>Pancreas</b>           | 3.72±0.83   | 0.15±0.05     | 0.01±0.00   | 0.01±0.00   |
| <b>Liver</b>              | 0.21±0.05   | 0.12± 0.06    | 0.04± 0.01  | 0.02±0.00   |
| <b>Heart</b>              | 0.12±0.02   | 0.04± 0.02    | 0.02± 0.00  | 0.01±0.01   |
| <b>Lungs</b>              | 0.83±0.05   | 0.62±0.05     | 0.39±0.06   | 0.30±0.04   |
| <b>Adrenals</b>           | 0.41±0.13   | 0.22± 0.08    | 0.06±0.04   | 0.03± 0.00  |
| <b>Spleen</b>             | 0.12±0.02   | 0.09± 0.01    | 0.05± 0.01  | 0.03±0.01   |
| <b>Bone</b>               | 0.52±0.84   | 0.05± 0.00    | 0.04± 0.01  | 0.05±0.02   |
| <b>Kidney</b>             | 1.76±0.61   | 0.78±0.14     | 0.17±0.02   | 0.07±0.01   |
| <b>Blood</b>              | 0.11±0.04   | 0.03± 0.03    | 0.01±0.00   | 0.01±0.00   |
| <b>Tumor/blood ratio</b>  | 32.92±6.30  | 173.17±38.25  | 77.52±9.4   | 33.48±17.78 |
| <b>Tumor/kidney</b>       | 2.15±0.42   | 4.03±0.39     | 2.73±0.23   | 1.75±0.82   |
| <b>Tumor/liver ratio</b>  | 17.60±2.97  | 36.50±15.57   | 10.69±2.75  | 4.84±3.02   |
| <b>Tumor/muscle ratio</b> | 99.26±46.10 | 252.27±104.52 | 98.73±26.56 | 36.34±19.52 |
| <b>Tumor/pancreas</b>     | 1.00±0.32   | 17.53±1.24    | 43.40±11.69 | 14.34±3.03  |

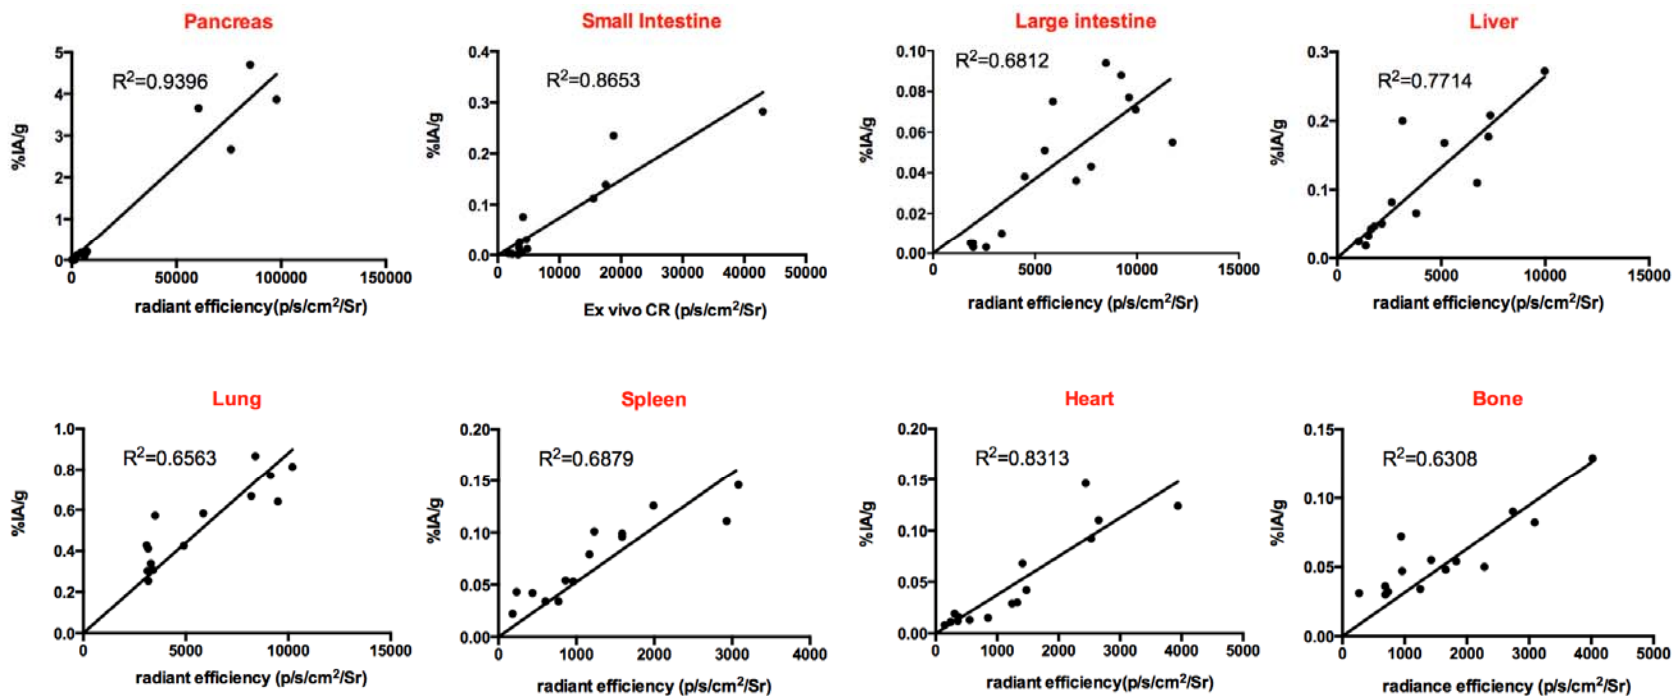

**SUPPLEMENTAL FIGURE 2.**

Correlation of *ex vivo* Cerenkov radiance (p/s/cm<sup>2</sup>/sr) and %IA/g in healthy organs of PC-3 tumor-bearing mice.
